# Supplementary material for: Disease trajectories and mortality among women diagnosed with breast cancer
Source: Breast Cancer Res. 2019 Aug 16;21:95. doi: 10.1186/s13058-019-1181-5 (PMC6698019; doi:10.1186/s13058-019-1181-5)
Supplement: Supplementary file 2 — Combined ICD-10 codes used for disease identification. (XLSX 61 kb) [file 13058_2019_1181_MOESM2_ESM.xlsx]

## Sheet: #LN00047
ICD10_code	icd10_DESCRIPTION	Combined_code	DESCRIPTION
A00	Cholera	A00	Bacterial intestinal infections
A01	Paratyphoid fever	A00	Bacterial intestinal infections
A02	Salmonella infection	A00	Bacterial intestinal infections
A03	Shigellosis	A00	Bacterial intestinal infections
A04	Bacterial intestinal infection	A00	Bacterial intestinal infections
A05	Bacterial foodborne intoxication	A00	Bacterial intestinal infections
A06	Amebiasis	A06	Amoebiasis and Other protozoal intestinal diseases
A07	Protozoal intestinal disease	A06	Amoebiasis and Other protozoal intestinal diseases
A08	Other specified intestinal infections	A08	Other specified intestinal infections
A09	Infectious gastroenteritis and colitis	A09	Infectious gastroenteritis and colitis
A15	Respiratory tuberculosis	A15	Tuberculosis
A16	Respiratory tuberculosis, not confirmed bacteriologically or histologically	A15	Tuberculosis
A17	Tuberculosis of nervous system	A15	Tuberculosis
A18	Tuberculosis of other sites	A15	Tuberculosis
A19	Miliary tuberculosis	A15	Tuberculosis
A20	Plague	A20	Certain zoonotic bacterial diseases
A21	Tularemia	A20	Certain zoonotic bacterial diseases
A22	Anthrax	A20	Certain zoonotic bacterial diseases
A23	Brucellosis	A20	Certain zoonotic bacterial diseases
A24	Melioidosis	A20	Certain zoonotic bacterial diseases
A25	Rat-bite fever	A20	Certain zoonotic bacterial diseases
A26	Erysipeloid	A20	Certain zoonotic bacterial diseases
A27	Leptospirosis	A20	Certain zoonotic bacterial diseases
A28	Zoonotic bacterial disease	A20	Certain zoonotic bacterial diseases
A30	Leprosy	A49	Other bacterial diseases excluding septicemia and erysipelas
A31	Mycobacterial infection	A49	Other bacterial diseases excluding septicemia and erysipelas
A32	Listeriosis	A49	Other bacterial diseases excluding septicemia and erysipelas
A33	Tetanus neonatorum	A49	Other bacterial diseases excluding septicemia and erysipelas
A34	Obstetrical tetanus	A49	Other bacterial diseases excluding septicemia and erysipelas
A35	Other tetanus	A49	Other bacterial diseases excluding septicemia and erysipelas
A36	Diphtheria	A49	Other bacterial diseases excluding septicemia and erysipelas
A37	Whooping cough species with pneumonia	A49	Other bacterial diseases excluding septicemia and erysipelas
A38	Scarlet fever, uncomplicated	A49	Other bacterial diseases excluding septicemia and erysipelas
A39	Meningococcal infection	A49	Other bacterial diseases excluding septicemia and erysipelas
A40	Streptococcal sepsis	A41	Sepsis
A41	Sepsis	A41	Sepsis
A42	Actinomycosis	A49	Other bacterial diseases excluding septicemia and erysipelas
A43	Nocardiosis	A49	Other bacterial diseases excluding septicemia and erysipelas
A44	Bartonellosis	A49	Other bacterial diseases excluding septicemia and erysipelas
A46	Erysipelas	A46	Erysipelas
A48	Other specified bacterial diseases	A49	Other bacterial diseases excluding septicemia and erysipelas
A49	Bacterial infection	A49	Other bacterial diseases excluding septicemia and erysipelas
A50	Congenital syphilis	A50	Bacterial STD
A51	Early syphilis	A50	Bacterial STD
A52	Late syphilis	A50	Bacterial STD
A53	Syphilis	A50	Bacterial STD
A54	Gonococcal infection	A50	Bacterial STD
A55	Chlamydial lymphogranuloma (venereum)	A50	Bacterial STD
A56	Sexually transmitted chlamydial infection of other sites	A50	Bacterial STD
A57	Chancroid	A50	Bacterial STD
A58	Granuloma inguinale	A50	Bacterial STD
A59	Trichomoniasis	A59	Other STD
A60	Anogenital herpesviral infection	A60	Viral STD
A63	Other specified predominantly sexually transmitted diseases	A59	Other STD
A64	sexually transmitted disease	A59	Other STD
A65	Nonvenereal syphilis	A69	Other spirochetal diseases
A66	Yaws	A69	Other spirochetal diseases
A67	Pinta	A69	Other spirochetal diseases
A68	Relapsing fever	A69	Other spirochetal diseases
A69	Spirochetal infection	A69	Other spirochetal diseases
A70	Chlamydia psittaci infections	A70	Other diseases caused by chlamydiae
A71	Trachoma	A70	Other diseases caused by chlamydiae
A74	Chlamydial infection	A70	Other diseases caused by chlamydiae
A75	Typhus fever	A79	Rickettsioses
A77	Spotted fever	A79	Rickettsioses
A78	Q fever	A79	Rickettsioses
A79	Rickettsiosis	A79	Rickettsioses
A80	Acute poliomyelitis	A89	Viral infections of the central nervous system
A81	Atypical virus infection of central nervous system	A89	Viral infections of the central nervous system
A82	Rabies	A89	Viral infections of the central nervous system
A83	Mosquito-borne viral encephalitis	A89	Viral infections of the central nervous system
A84	Tick-borne viral encephalitis	A89	Viral infections of the central nervous system
A85	Other specified viral encephalitis	A89	Viral infections of the central nervous system
A86	viral encephalitis	A89	Viral infections of the central nervous system
A87	Viral meningitis	A89	Viral infections of the central nervous system
A88	Other specified viral infections of central nervous system	A89	Viral infections of the central nervous system
A89	viral infection of central nervous system	A89	Viral infections of the central nervous system
A90	Dengue fever [classical dengue]	A99	Arthropod-borne viral fevers and viral hemorrhagic fevers
A91	Dengue hemorrhagic fever	A99	Arthropod-borne viral fevers and viral hemorrhagic fevers
A92	Mosquito-borne viral fever	A99	Arthropod-borne viral fevers and viral hemorrhagic fevers
A93	Other specified arthropod-borne viral fevers	A99	Arthropod-borne viral fevers and viral hemorrhagic fevers
A94	arthropod-borne viral fever	A99	Arthropod-borne viral fevers and viral hemorrhagic fevers
A95	Yellow fever	A99	Arthropod-borne viral fevers and viral hemorrhagic fevers
A96	Arenaviral hemorrhagic fever	A99	Arthropod-borne viral fevers and viral hemorrhagic fevers
A98	Other specified viral hemorrhagic fevers	A99	Arthropod-borne viral fevers and viral hemorrhagic fevers
A99	viral hemorrhagic fever	A99	Arthropod-borne viral fevers and viral hemorrhagic fevers
B00	Herpesviral infection	B09	Viral infections characterized by skin and mucous membrane lesions
B01	Varicella without complication	B09	Viral infections characterized by skin and mucous membrane lesions
B02	Zoster without complications	B09	Viral infections characterized by skin and mucous membrane lesions
B03	Smallpox	B09	Viral infections characterized by skin and mucous membrane lesions
B04	Monkeypox	B09	Viral infections characterized by skin and mucous membrane lesions
B05	Measles without complication	B09	Viral infections characterized by skin and mucous membrane lesions
B06	Rubella without complication	B09	Viral infections characterized by skin and mucous membrane lesions
B07	Viral wart	B09	Viral infections characterized by skin and mucous membrane lesions
B08	Oth viral infections with skin and mucous membrane lesions	B09	Viral infections characterized by skin and mucous membrane lesions
B09	Unsp viral infection with skin and mucous membrane lesions	B09	Viral infections characterized by skin and mucous membrane lesions
B15	Hepatitis A without hepatic coma	B15	Hepatitis
B16	Acute hepatitis B w/o delta-agent	B15	Hepatitis
B17	Acute viral hepatitis	B15	Hepatitis
B18	Chronic viral hepatitis	B15	Hepatitis
B19	viral hepatitis	B15	Hepatitis
B20	Human immunodeficiency virus [HIV] disease	B20	HIV
B21	Human immunodeficiency virus [HIV] disease	B20	HIV
B22	Human immunodeficiency virus [HIV] disease	B20	HIV
B23	Human immunodeficiency virus [HIV] disease	B20	HIV
B24	Human immunodeficiency virus [HIV] disease	B20	HIV
B25	Cytomegaloviral disease	B34	Other viral diseases
B26	Mumps without complication	B34	Other viral diseases
B27	Infectious mononucleosis	B34	Other viral diseases
B30	Viral conjunctivitis	B34	Other viral diseases
B33	Other specified viral diseases	B34	Other viral diseases
B34	Viral infection	B34	Other viral diseases
B35	Dermatophytosis	B49	Mycoses
B36	Superficial mycosis	B49	Mycoses
B37	Candidiasis	B49	Mycoses
B38	Coccidioidomycosis	B49	Mycoses
B39	Histoplasmosis	B49	Mycoses
B40	Blastomycosis	B49	Mycoses
B41	Paracoccidioidomycosis	B49	Mycoses
B42	Sporotrichosis	B49	Mycoses
B43	Chromomycosis	B49	Mycoses
B44	Aspergillosis	B49	Mycoses
B45	Cryptococcosis	B49	Mycoses
B46	Zygomycosis	B49	Mycoses
B47	Mycetoma	B49	Mycoses
B48	Other specified mycoses	B49	Mycoses
B49	mycosis	B49	Mycoses
B50	Plasmodium falciparum malaria	B64	Protozoal diseases
B51	Plasmodium vivax malaria without complication	B64	Protozoal diseases
B52	Plasmodium malariae malaria without complication	B64	Protozoal diseases
B53	Other malaria, not elsewhere classified	B64	Protozoal diseases
B54	malaria	B64	Protozoal diseases
B55	Leishmaniasis	B64	Protozoal diseases
B56	African trypanosomiasis	B64	Protozoal diseases
B57	Chagas' disease (chronic) with other organ involvement	B64	Protozoal diseases
B58	Toxoplasmosis	B64	Protozoal diseases
B59	Pneumocystosis	B64	Protozoal diseases
B60	Other specified protozoal diseases	B64	Protozoal diseases
B64	protozoal disease	B64	Protozoal diseases
B65	Schistosomiasis	B83	Heminthiases
B66	Fluke infection	B83	Heminthiases
B67	Other echinococcosis	B83	Heminthiases
B68	Taeniasis	B83	Heminthiases
B69	Cysticercosis	B83	Heminthiases
B70	Sparganosis	B83	Heminthiases
B71	Cestode infection	B83	Heminthiases
B72	Dracunculiasis	B83	Heminthiases
B73	Onchocerciasis without eye disease	B83	Heminthiases
B74	Filariasis	B83	Heminthiases
B75	Trichinellosis	B83	Heminthiases
B76	Hookworm disease	B83	Heminthiases
B77	Ascariasis	B83	Heminthiases
B78	Strongyloidiasis	B83	Heminthiases
B79	Trichuriasis	B83	Heminthiases
B80	Enterobiasis	B83	Heminthiases
B81	Other specified intestinal helminthiases	B83	Heminthiases
B82	Intestinal parasitism	B83	Heminthiases
B83	Helminthiasis	B83	Heminthiases
B85	Mixed pediculosis and phthiriasis	B89	Pediculosis, acariasis and other infestations
B86	Scabies	B89	Pediculosis, acariasis and other infestations
B87	Myiasis	B89	Pediculosis, acariasis and other infestations
B88	Infestation	B89	Pediculosis, acariasis and other infestations
B89	parasitic disease	B89	Pediculosis, acariasis and other infestations
B90	Sequelae of respiratory and tuberculosis	B94	Sequelae of infectious and parasitic diseases
B91	Sequelae of poliomyelitis	B94	Sequelae of infectious and parasitic diseases
B92	Sequelae of leprosy	B94	Sequelae of infectious and parasitic diseases
B94	Sequelae of infectious and parasitic disease	B94	Sequelae of infectious and parasitic diseases
B95	staphylococcus as the cause of diseases classed elsewhere	B96	Bacterial infectious agents
B96	Other bacterial agents as the cause of diseases classed elsewhere	B96	Bacterial infectious agents
B97	Other viral agents as the cause of diseases classed elsewhere	B97	Viral infectious agents
B98	Other specified infectious agents as the cause of diseases classified to other chapters	B96	Bacterial infectious agents
B99	infectious disease	B99	Other infectious diseases
C00	Malignant neoplasm of lip	C00	Solid malignancies other than breast cancer
C01	Malignant neoplasm of base of tongue	C00	Solid malignancies other than breast cancer
C02	Malignant neoplasm of tongue	C00	Solid malignancies other than breast cancer
C03	Malignant neoplasm of gum	C00	Solid malignancies other than breast cancer
C04	Malignant neoplasm of floor of mouth	C00	Solid malignancies other than breast cancer
C05	Malignant neoplasm of palate	C00	Solid malignancies other than breast cancer
C06	Malignant neoplasm of mouth	C00	Solid malignancies other than breast cancer
C07	Malignant neoplasm of parotid gland	C00	Solid malignancies other than breast cancer
C08	Malignant neoplasm of major salivary gland	C00	Solid malignancies other than breast cancer
C09	Malignant neoplasm of tonsil	C00	Solid malignancies other than breast cancer
C10	Malignant neoplasm of oropharynx	C00	Solid malignancies other than breast cancer
C11	Malignant neoplasm of nasopharynx	C00	Solid malignancies other than breast cancer
C12	Malignant neoplasm of pyriform sinus	C00	Solid malignancies other than breast cancer
C13	Malignant neoplasm of hypopharynx	C00	Solid malignancies other than breast cancer
C14	Malig neoplm of ovrlp sites of lip, oral cavity and pharynx	C00	Solid malignancies other than breast cancer
C15	Malignant neoplasm of esophagus	C00	Solid malignancies other than breast cancer
C16	Malignant neoplasm of stomach	C00	Solid malignancies other than breast cancer
C17	Malignant neoplasm of small intestine	C00	Solid malignancies other than breast cancer
C18	Malignant neoplasm of colon	C00	Solid malignancies other than breast cancer
C19	Malignant neoplasm of rectosigmoid junction	C00	Solid malignancies other than breast cancer
C20	Malignant neoplasm of rectum	C00	Solid malignancies other than breast cancer
C21	Malig neoplasm of ovrlp sites of rectum, anus and anal canal	C00	Solid malignancies other than breast cancer
C22	Malig neoplasm of liver, not specified as primary or second	C00	Solid malignancies other than breast cancer
C23	Malignant neoplasm of gallbladder	C00	Solid malignancies other than breast cancer
C24	Malignant neoplasm of biliary tract	C00	Solid malignancies other than breast cancer
C25	Malignant neoplasm of pancrease	C00	Solid malignancies other than breast cancer
C26	Malignant neoplasm of ill-defined sites within the digestive system	C00	Solid malignancies other than breast cancer
C30	Malignant neoplasm of middle ear	C00	Solid malignancies other than breast cancer
C31	Malignant neoplasm of accessory sinus	C00	Solid malignancies other than breast cancer
C32	Malignant neoplasm of larynx	C00	Solid malignancies other than breast cancer
C33	Malignant neoplasm of trachea	C00	Solid malignancies other than breast cancer
C34	Malignant neoplasm of unsp part of bronchus and lung	C00	Solid malignancies other than breast cancer
C37	Malignant neoplasm of thymus	C00	Solid malignancies other than breast cancer
C38	Malig neoplm of ovrlp sites of heart, mediastinum and pleura	C00	Solid malignancies other than breast cancer
C39	Malignant neoplasm of lower respiratory tract	C00	Solid malignancies other than breast cancer
C40	Malig neoplasm of bone and articular cartilage of limbs	C00	Solid malignancies other than breast cancer
C41	Malignant neoplasm of bone and articular cartilage of other and unspecified sites	C00	Solid malignancies other than breast cancer
C43	Malignant melanoma of skin	C00	Solid malignancies other than breast cancer
C44	Other specified malignant neoplasm of skin	C00	Solid malignancies other than breast cancer
C45	Mesothelioma	C00	Solid malignancies other than breast cancer
C46	Kaposi's sarcoma	C00	Solid malignancies other than breast cancer
C47	Malig neoplasm of peripheral nerves and autonomic nervous system	C00	Solid malignancies other than breast cancer
C48	Malig neoplasm of ovrlp sites of retroperiton and peritoneum	C00	Solid malignancies other than breast cancer
C49	Gastrointestinal stromal tumor of other sites	C00	Solid malignancies other than breast cancer
C50	Malignant neoplasm of breast	C50	Breast cancer
C51	Malignant neoplasm of vulva	C00	Solid malignancies other than breast cancer
C52	Malignant neoplasm of vagina	C00	Solid malignancies other than breast cancer
C53	Malignant neoplasm of cervix uteri	C00	Solid malignancies other than breast cancer
C54	Malignant neoplasm of corpus uteri	C00	Solid malignancies other than breast cancer
C55	Malignant neoplasm of uterus	C00	Solid malignancies other than breast cancer
C56	Malignant neoplasm of ovary	C00	Solid malignancies other than breast cancer
C57	Malignant neoplasm of female genital organ	C00	Solid malignancies other than breast cancer
C58	Malignant neoplasm of placenta	C00	Solid malignancies other than breast cancer
C60	Malignant neoplasm of penis	C00	Solid malignancies other than breast cancer
C61	Malignant neoplasm of prostate	C00	Solid malignancies other than breast cancer
C62	Malig neoplasm of testis	C00	Solid malignancies other than breast cancer
C63	Malignant neoplasm of male genital organ	C00	Solid malignancies other than breast cancer
C64	Malignant neoplasm of unsp kidney, except renal pelvis	C00	Solid malignancies other than breast cancer
C65	Malignant neoplasm of renal pelvis	C00	Solid malignancies other than breast cancer
C66	Malignant neoplasm of ureter	C00	Solid malignancies other than breast cancer
C67	Malignant neoplasm of bladder	C00	Solid malignancies other than breast cancer
C68	Malignant neoplasm of urinary organ	C00	Solid malignancies other than breast cancer
C69	Malignant neoplasm of eye and adnexa	C00	Solid malignancies other than breast cancer
C70	Malignant neoplasm of meninges	C00	Solid malignancies other than breast cancer
C71	Malignant neoplasm of brain	C00	Solid malignancies other than breast cancer
C72	Malignant neoplasm of central nervous system	C00	Solid malignancies other than breast cancer
C73	Malignant neoplasm of thyroid gland	C00	Solid malignancies other than breast cancer
C74	Malignant neoplasm of adrenal gland	C00	Solid malignancies other than breast cancer
C75	Malignant neoplasm of endocrine gland	C00	Solid malignancies other than breast cancer
C76	Malignant neoplasm of other specified ill-defined sites	C00	Solid malignancies other than breast cancer
C80	Malignant neoplasm associated with transplanted organ	C00	Solid malignancies other than breast cancer
C81	Hodgkin lymphoma, unsp, extranodal and solid organ sites	C81	Hematological and lymphoid malignancies
C82	Follicular lymphoma, unsp, extranodal and solid organ sites	C81	Hematological and lymphoid malignancies
C83	Non-follic lymphoma, unsp, extrnod and solid organ sites	C81	Hematological and lymphoid malignancies
C84	Oth mature T/NK-cell lymph, extrnod and solid organ sites	C81	Hematological and lymphoid malignancies
C85	Non-Hodgkin lymphoma, unsp, extranodal and solid organ sites	C81	Hematological and lymphoid malignancies
C86	Primary cutaneous CD30-positive T-cell proliferations	C81	Hematological and lymphoid malignancies
C88	Malignant immunoproliferative disease	C81	Hematological and lymphoid malignancies
C90	Solitary plasmacytoma in relapse	C81	Hematological and lymphoid malignancies
C91	Other lymphoid leukemia, in relapse	C81	Hematological and lymphoid malignancies
C92	Other myeloid leukemia, in relapse	C81	Hematological and lymphoid malignancies
C93	Other monocytic leukemia, in relapse	C81	Hematological and lymphoid malignancies
C94	Other specified leukemias, in relapse	C81	Hematological and lymphoid malignancies
C95	Leukemia, in relapse	C81	Hematological and lymphoid malignancies
C96	Oth malig neoplm of lymphoid, hematpoetc and related tissue	C81	Hematological and lymphoid malignancies
C97	Malignant neoplasms of independent (primary) multiple sites	C00	Solid malignancies other than breast cancer
D00	Carcinoma in situ of stomach	D00	Other benign tumor
D01	Carcinoma in situ of digestive organ	D00	Other benign tumor
D02	Carcinoma in situ of respiratory system	D00	Other benign tumor
D03	Melanoma in situ	D00	Other benign tumor
D04	Carcinoma in situ of skin	D00	Other benign tumor
D06	Carcinoma in situ of cervix	D00	Other benign tumor
D07	Carcinoma in situ of other male genital organs	D00	Other benign tumor
D09	Carcinoma in situ	D00	Other benign tumor
D10	Benign neoplasm of pharynx	D00	Other benign tumor
D11	Benign neoplasm of major salivary gland	D00	Other benign tumor
D12	Benign neoplasm of anus and anal canal	D00	Other benign tumor
D13	Benign neoplasm of ill-defined sites within the dgstv sys	D00	Other benign tumor
D14	Benign neoplasm of respiratory system	D00	Other benign tumor
D15	Benign neoplasm of intrathoracic organ	D00	Other benign tumor
D16	Benign neoplasm of bone and articular cartilage	D00	Other benign tumor
D17	Benign lipomatous neoplasm	D00	Other benign tumor
D18	Lymphangioma, any site	D00	Other benign tumor
D19	Benign neoplasm of mesothelial tissue	D00	Other benign tumor
D20	Benign neoplasm of soft tissue of peritoneum	D00	Other benign tumor
D21	Benign neoplasm of connective and other soft tissue, unsp	D00	Other benign tumor
D22	Melanocytic nevi	D00	Other benign tumor
D23	Other benign neoplasm of skin	D00	Other benign tumor
D25	Leiomyoma of uterus	D00	Other benign tumor
D26	Other benign neoplasm of uterus	D00	Other benign tumor
D27	Benign neoplasm of ovary	D00	Other benign tumor
D28	Benign neoplasm of female genital organ	D00	Other benign tumor
D29	Benign neoplasm of male genital organ	D00	Other benign tumor
D30	Benign neoplasm of urinary organ	D00	Other benign tumor
D31	Benign neoplasm of eye	D00	Other benign tumor
D32	Benign neoplasm of meninges	D00	Other benign tumor
D33	Benign neoplasm of central nervous system	D00	Other benign tumor
D34	Benign neoplasm of thyroid gland	D00	Other benign tumor
D35	Benign neoplasm of endocrine gland	D00	Other benign tumor
D36	Benign neoplasm site uncertain	D00	Other benign tumor
D37	Neoplasm of uncertain behavior of digestive organ, unsp	D00	Other benign tumor
D38	Neoplasm of uncertain behavior of respiratory organ, unsp	D00	Other benign tumor
D39	Neoplasm of uncertain behavior of female genital organ, unsp	D00	Other benign tumor
D40	Neoplasm of uncertain behavior of male genital organ, unsp	D00	Other benign tumor
D41	Neoplasm of uncertain behavior of urinary organ	D00	Other benign tumor
D42	Neoplasm of uncertain behavior of meninges	D00	Other benign tumor
D43	Neoplasm of uncertain behavior of cnsl, unsp	D00	Other benign tumor
D44	Neoplasm of uncertain behavior of unsp endocrine gland	D00	Other benign tumor
D45	Polycythemia vera	D00	Other benign tumor
D46	Other myelodysplastic syndromes	D00	Other benign tumor
D47	Oth neoplm of uncrt behav of lymphoid, hematpoetc & rel tiss	D00	Other benign tumor
D48	Neoplasm of uncertain behavior	D00	Other benign tumor
D50	Iron deficiency anemia	D50	Anemia
D51	Vitamin B12 deficiency anemia	D50	Anemia
D52	Folate deficiency anemia	D50	Anemia
D53	Nutritional anemia	D50	Anemia
D55	Anemia due to enzyme disorder	D50	Anemia
D56	Thalassemia	D50	Anemia
D57	Other sickle-cell disorders with crisis	D50	Anemia
D58	Hereditary hemolytic anemia	D50	Anemia
D59	Acquired hemolytic anemia	D50	Anemia
D60	Acquired pure red cell aplasia	D50	Anemia
D61	Aplastic anemia	D50	Anemia
D62	Acute posthemorrhagic anemia	D50	Anemia
D63	Anemia in other chronic diseases classified elsewhere	D50	Anemia
D64	Anemia	D50	Anemia
D65	Disseminated intravascular coagulation	D65	Disseminated intravascular coagulation
D66	Hereditary factor VIII deficiency	D66	Hereditary blood disorder
D67	Hereditary factor IX deficiency	D66	Hereditary blood disorder
D68	Coagulation defect	D68	Secondary bleeding disorders
D69	Hemorrhagic condition	D69	Purpura and other hemorrhagic conditions
D70	Neutropenia	D70	Neutropenia
D71	Functional disorders of polymorphonuclear neutrophils	D71	Functional disorders of polymorphonuclear neutrophils
D72	Disorder of white blood cells	D72	Eosinophilia
D73	Disease of spleen	D73	Disease of spleen
D74	Methemoglobinemia	D74	Methemoglobinemia
D75	Disease of blood and blood-forming organs	D75	Other diseases of the blood and lymphatic system
D76	Other histiocytosis syndromes	D75	Other diseases of the blood and lymphatic system
D77	Oth disord of bld/bld-frm organs in diseases classd elswhr	D75	Other diseases of the blood and lymphatic system
D78	Other postprocedural complications of the spleen	D75	Other diseases of the blood and lymphatic system
D80	Immunodeficiency with predominantly antibody defects, unsp	D80	Immunodeficiencies
D81	Combined immunodeficiency	D80	Immunodeficiencies
D82	Immunodeficiency associated with major defect	D80	Immunodeficiencies
D83	Common variable immunodeficiency	D80	Immunodeficiencies
D84	Immunodeficiency	D80	Immunodeficiencies
D86	Sarcoidosis	D86	Sarcoidosis
D89	Disorder involving the immune mechanism	D80	Immunodeficiencies
E00	Congenital iodine-deficiency syndrome	E00	Hypothyroid conditions
E01	Oth iodine-deficiency related thyroid disord and allied cond	E00	Hypothyroid conditions
E02	Subclinical iodine-deficiency hypothyroidism	E00	Hypothyroid conditions
E03	Hypothyroidism	E00	Hypothyroid conditions
E04	Nontoxic goiter	E04	Non-toxic goiter
E05	Thyrotoxicosis with thyrotoxic crisis or storm	E05	Graves’ disease
E06	Thyroiditis	E02	Thyroid disorders
E07	Disorder of thyroid	E02	Thyroid disorders
E10	Type 1 diabetes mellitus without complications	E10	Diabetes
E11	Type 2 diabetes mellitus without complications	E10	Diabetes
E12	Malnutrition-related diabetes mellitus	E10	Diabetes
E13	Other specified diabetes mellitus without complications	E10	Diabetes
E14	Other specified diabetes	E10	Diabetes
E15	Nondiabetic hypoglycemic coma	E15	Hypoglycemia
E16	Disorder of pancreatic internal secretion	E16	Disorder of pancreatic internal secretion
E20	Hypoparathyroidism	E20	Hypoparathyroidism
E21	Disorder of parathyroid gland	E21	Hyperparathyroidism
E22	Hyperfunction of pituitary gland	E22	Hyperfunction of pituitary gland
E23	Disorder of pituitary gland	E23	Hypofunction and other disorders of the hypophysis
E24	Cushing's syndrome	E24	Cushing's syndrome
E25	Adrenogenital disorder	E25	Adrenogenital disorder
E26	Hyperaldosteronism	E26	Hyperaldosteronism
E27	Disorder of adrenal gland	E27	Disorder of adrenal gland
E28	Ovarian dysfunction	E28	Ovarian dysfunction
E29	Testicular dysfunction	E29	Testicular dysfunction
E30	Disorder of puberty	E30	Disorder of puberty
E31	Polyglandular dysfunction	E31	Polyglandular dysfunction
E32	Disease of thymus	E32	Disease of thymus
E34	Endocrine disorder	E34	Other Endocrine disorder
E35	Disorders of endocrine glands in diseases classd elswhr	E35	Disorders of endocrine glands in diseases classd elswhr
E36	Other intraoperative complications of endocrine system	E36	Other intraoperative complications of endocrine system
E40	Kwashiorkor	E40	Malnutrition
E41	Nutritional marasmus	E40	Malnutrition
E42	Marasmic kwashiorkor	E40	Malnutrition
E43	severe protein-calorie malnutrition	E40	Malnutrition
E44	Mild protein-calorie malnutrition	E40	Malnutrition
E45	Retarded development following protein-calorie malnutrition	E40	Malnutrition
E46	protein-calorie malnutrition	E40	Malnutrition
E50	Vitamin A deficiency	E40	Malnutrition
E51	Thiamine deficiency	E40	Malnutrition
E52	Niacin deficiency [pellagra]	E40	Malnutrition
E53	Vitamin B deficiency	E40	Malnutrition
E54	Ascorbic acid deficiency	E40	Malnutrition
E55	Vitamin D deficiency	E40	Malnutrition
E56	Vitamin deficiency	E40	Malnutrition
E58	Dietary calcium deficiency	E40	Malnutrition
E59	Dietary selenium deficiency	E40	Malnutrition
E60	Dietary zinc deficiency	E40	Malnutrition
E61	Deficiency of nutrient element	E40	Malnutrition
E63	Nutritional deficiency	E40	Malnutrition
E64	Sequelae of nutritional deficiency	E40	Malnutrition
E65	Localized adiposity	E65	Obesity and other hypernutrition disorders
E66	Obesity	E65	Obesity and other hypernutrition disorders
E67	Other specified hyperalimentation	E65	Obesity and other hypernutrition disorders
E68	Sequelae of hyperalimentation	E65	Obesity and other hypernutrition disorders
E70	Disorder of aromatic amino-acid metabolism	E70	Other Metabolic disorders
E71	Other peroxisomal disorders	E70	Other Metabolic disorders
E72	Disorder of amino-acid metabolism	E70	Other Metabolic disorders
E73	Lactose intolerance	E70	Other Metabolic disorders
E74	Disorder of carbohydrate metabolism	E70	Other Metabolic disorders
E75	Lipid storage disorder	E70	Other Metabolic disorders
E76	Glucosaminoglycan metabolism disorder	E70	Other Metabolic disorders
E77	Disorder of glycoprotein metabolism	E70	Other Metabolic disorders
E78	Disorder of lipoprotein metabolism	E70	Other Metabolic disorders
E79	Disorder of purine and pyrimidine metabolism	E70	Other Metabolic disorders
E80	Disorder of bilirubin metabolism	E70	Other Metabolic disorders
E83	Disorder of mineral metabolism	E83	Disorders of mineral metabolism
E84	Cystic fibrosis	E84	Cystic fibrosis
E85	Amyloidosis	E85	Amyloidosis
E86	Volume depletion	E86	Volume depletion
E87	Oth disorders of electrolyte and fluid balance, NEC	E86	Volume depletion
E88	Metabolic disorder	E88	Metabolic disorder(tumor lysis syndrome due to antineoplastic treatment)
E89	Oth postproc endocrine and metabolic comp and disorders	E89	Oth postproc endocrine and metabolic comp and disorders
E90	Nutritional and metabolic disorders in diseases classified elsewhere	E90	Nutritional and metabolic disorders in diseases classified elsewhere
F00	Dementia	F00	Dementia
F01	Vascular dementia with behavioral disturbance	F00	Dementia
F02	Dementia in oth diseases classd elswhr w behavioral disturb	F00	Dementia
F03	dementia with behavioral disturbance	F00	Dementia
F04	Amnestic disorder due to known physiological condition	F09	Other organic mental disorder
F05	Delirium due to known physiological condition	F05	Delirium due to known physiological condition
F06	Oth mental disorders due to known physiological condition	F06	Oth mental disorders due to known physiological condition(cognitive disorder)
F07	Unsp personality & behavrl disord due to known physiol cond	F09	Other organic mental disorder
F09	Unsp mental disorder due to known physiological condition	F09	Other organic mental disorder
F10	Alcohol use, unsp with alcohol-induced disorder	F10	Substances abuse
F11	Opioid use, unsp with opioid-induced disorder	F10	Substances abuse
F12	Cannabis use, unsp with unsp cannabis-induced disorder	F10	Substances abuse
F13	Sedative, hypnotic or anxiolytic use, unsp w unsp disorder	F10	Substances abuse
F14	Cocaine use, unsp with cocaine-induced disorder	F10	Substances abuse
F15	Oth stimulant use, unsp with unsp stimulant-induced disorder	F10	Substances abuse
F16	Hallucinogen use, unsp w unsp hallucinogen-induced disorder	F10	Substances abuse
F17	Nicotine dependence, oth tobacco product, w unsp disorders	F10	Substances abuse
F18	Inhalant use, unsp with unsp inhalant-induced disorder	F10	Substances abuse
F19	Oth psychoactive substance use, unsp w unsp disorder	F10	Substances abuse
F20	Schizophrenia	F20	Schizophrenia
F21	Schizotypal disorder	F20	Schizophrenia
F22	Delusional disorders	F20	Schizophrenia
F23	Brief psychotic disorder	F20	Schizophrenia
F24	Shared psychotic disorder	F20	Schizophrenia
F25	Schizoaffective disorder	F20	Schizophrenia
F28	Oth psych disorder not due to a sub or known physiol cond	F20	Schizophrenia
F29	Unsp psychosis not due to a substance or known physiol cond	F20	Schizophrenia
F30	Manic episode	F30	Bipolar disorder
F31	Bipolar disorder	F30	Bipolar disorder
F32	Major depressive disorder, single episode	F32	Depression
F33	Major depressive disorder, recurrent	F32	Depression
F34	Persistent mood [affective] disorder	F39	Other mood disorder
F38	mood [affective] disorder	F39	Other mood disorder
F39	mood [affective] disorder	F39	Other mood disorder
F40	Phobic anxiety disorder	F40	Anxiety
F41	Anxiety disorder	F40	Anxiety
F42	Obsessive-compulsive disorder	F42	Obsessive-compulsive disorder
F43	Reaction to severe stress	F43	Reaction to severe stress
F44	Dissociative and conversion disorder	F44	other somatoform
F45	Somatoform disorder	F45	Somatoform disorder
F48	Nonpsychotic mental disorder	F48	Nonpsychotic mental disorder
F50	Eating disorder	F50	Eating disorder
F51	Sleep disorder not due to a sub or known physiol cond, unsp	F51	Sleep disorder not due to a sub or known physiological condition
F52	Unsp sexual dysfnct not due to a sub or known physiol cond	F52	Unsp sexual dysfnct not due to a sub or known physiol cond
F53	Puerperal psychosis	F53	Puerperal psychosis
F54	Psych & behavrl factors assoc w disord or dis classd elswhr	F54	Psych & behavrl factors assoc w disord or dis classd elswhr
F55	Abuse of other non-psychoactive substances	F55	Abuse of other non-psychoactive substances
F59	Unsp behavrl synd assoc w physiol disturb and physcl factors	F59	Unsp behavrl synd assoc w physiol disturb and physcl factors
F60	Personality disorder	F60	Personality disorder
F61	Mixed and other personality disorders	F60	Personality disorder
F62	Enduring personality changes, not attributable to brain damage and disease	F60	Personality disorder
F63	Impulse disorder	F60	Personality disorder
F64	Gender identity disorder	F60	Personality disorder
F65	Paraphilia	F60	Personality disorder
F66	Other sexual disorders	F60	Personality disorder
F68	Other specified disorders of adult personality and behavior	F60	Personality disorder
F69	disorder of adult personality and behavior	F60	Personality disorder
F70	Mild intellectual disabilities	F70	Developmental disorders
F71	Moderate intellectual disabilities	F70	Developmental disorders
F72	Severe intellectual disabilities	F70	Developmental disorders
F73	Profound intellectual disabilities	F70	Developmental disorders
F78	Other intellectual disabilities	F70	Developmental disorders
F79	intellectual disabilities	F70	Developmental disorders
F80	Developmental disorder of speech and language	F70	Developmental disorders
F81	Developmental disorder of scholastic skills	F70	Developmental disorders
F82	Specific developmental disorder of motor function	F70	Developmental disorders
F84	Pervasive developmental disorder	F70	Developmental disorders
F88	Other disorders of psychological development	F70	Developmental disorders
F89	disorder of psychological development	F70	Developmental disorders
F90	Attention-deficit hyperactivity disorder type	F90	Behavioral disorders with debut during childhood
F91	Conduct disorder	F90	Behavioral disorders with debut during childhood
F92	Mixed disorders of conduct and emotions	F90	Behavioral disorders with debut during childhood
F93	Childhood emotional disorder	F90	Behavioral disorders with debut during childhood
F94	Childhood disorder of social functioning	F90	Behavioral disorders with debut during childhood
F95	Tic disorder	F90	Behavioral disorders with debut during childhood
F98	Unsp behav/emotn disord w onst usly occur in chldhd and adol	F90	Behavioral disorders with debut during childhood
F99	Mental disorder, not otherwise specified	F99	Mental disorder, not otherwise specified
G00	Bacterial meningitis	G00	Meningitis, encephalitis and abscess in the CNS
G01	Meningitis in bacterial diseases classified elsewhere	G00	Meningitis, encephalitis and abscess in the CNS
G02	Meningitis in oth infec/parastc diseases classd elswhr	G00	Meningitis, encephalitis and abscess in the CNS
G03	Meningitis	G00	Meningitis, encephalitis and abscess in the CNS
G04	Myelitis	G00	Meningitis, encephalitis and abscess in the CNS
G05	Myelitis in diseases classified elsewhere	G00	Meningitis, encephalitis and abscess in the CNS
G06	Extradural and subdural abscess	G00	Meningitis, encephalitis and abscess in the CNS
G07	Intcrn & intraspinal abscs & granuloma in dis classd elswhr	G00	Meningitis, encephalitis and abscess in the CNS
G08	Intracranial and intraspinal phlebitis and thrombophlebitis	G08	Intracranial and intraspinal phlebitis and thrombophlebitis
G09	Sequelae of inflammatory diseases of central nervous system	G09	Sequelae of inflammatory diseases of central nervous system
G10	Huntington's disease	G10	Systemic atrophies primarily engaging the CNS
G11	Hereditary ataxia	G10	Systemic atrophies primarily engaging the CNS
G12	Spinal muscular atrophy	G10	Systemic atrophies primarily engaging the CNS
G13	Systemic atrophy aff cnsl in oth diseases classd elswhr	G10	Systemic atrophies primarily engaging the CNS
G14	Postpolio syndrome	G10	Systemic atrophies primarily engaging the CNS
G20	Parkinson's disease	G20	Diseases of the basal ganglia and movement disorders
G21	Secondary parkinsonism	G20	Diseases of the basal ganglia and movement disorders
G22	Parkinsonism in diseases classified elsewhere	G20	Diseases of the basal ganglia and movement disorders
G23	Degenerative disease of basal ganglia	G20	Diseases of the basal ganglia and movement disorders
G24	Dystonia	G20	Diseases of the basal ganglia and movement disorders
G25	Extrapyramidal and movement disorder	G20	Diseases of the basal ganglia and movement disorders
G26	Extrapyramidal and movement disord in diseases classd elswhr	G20	Diseases of the basal ganglia and movement disorders
G30	Alzheimer's disease	G30	Other degenerative diseases in the CNS (including Alzheimer’s disease)
G31	Degenerative disease of nervous system	G30	Other degenerative diseases in the CNS (including Alzheimer’s disease)
G32	Oth degeneratv disord of nervous sys in dis classd elswhr	G30	Other degenerative diseases in the CNS (including Alzheimer’s disease)
G35	Multiple sclerosis	G35	Multiple sclerosis,Myelin destroying diseases of the CNS
G36	Acute disseminated demyelination	G35	Multiple sclerosis,Myelin destroying diseases of the CNS
G37	Demyelinating disease of central nervous system	G35	Multiple sclerosis,Myelin destroying diseases of the CNS
G40	Juvenile myoclonic epilepsy, intractable, w/o stat epi	G40	Epilepsia
G41	Epilepsia	G40	Epilepsia
G43	Abdominal migraine, intractable	G43	Migraine
G44	Other headache syndrome	G44	Other headache syndromes
G45	Transient cerebral ischemic attack	G45	Transient cerebral ischemic attack
G46	Oth vascular syndromes of brain in cerebrovascular diseases	G46	Oth vascular syndromes of brain in cerebrovascular diseases
G47	Sleep disorder	G47	Sleep disorder
G50	Disorder of trigeminal nerve	G50	Diseases in nerves, nerve roots and nerve plexa
G51	Disorder of facial nerve	G50	Diseases in nerves, nerve roots and nerve plexa
G52	Cranial nerve disorder	G50	Diseases in nerves, nerve roots and nerve plexa
G53	Cranial nerve disorders in diseases classified elsewhere	G50	Diseases in nerves, nerve roots and nerve plexa
G54	Nerve root and plexus disorder	G50	Diseases in nerves, nerve roots and nerve plexa
G55	Nerve root and plexus compressions in diseases classd elswhr	G50	Diseases in nerves, nerve roots and nerve plexa
G56	mononeuropathy of bilateral upper limbs	G50	Diseases in nerves, nerve roots and nerve plexa
G57	mononeuropathy of bilateral lower limbs	G50	Diseases in nerves, nerve roots and nerve plexa
G58	Mononeuropathy	G50	Diseases in nerves, nerve roots and nerve plexa
G59	Mononeuropathy in diseases classified elsewhere	G50	Diseases in nerves, nerve roots and nerve plexa
G60	Hereditary and idiopathic neuropathy	G60	Polyneuropathies
G61	Inflammatory polyneuropathy	G60	Polyneuropathies
G62	Polyneuropathy	G60	Polyneuropathies
G63	Polyneuropathy in diseases classified elsewhere	G60	Polyneuropathies
G64	Other disorders of peripheral nervous system	G64	Other disorders of peripheral nervous system
G65	Sequelae of toxic polyneuropathy	G65	Sequelae of toxic polyneuropathy
G70	Myoneural disorder	G70	Neuromuscular diseases
G71	Primary disorder of muscle	G70	Neuromuscular diseases
G72	Myopathy	G70	Neuromuscular diseases
G73	Myopathy in diseases classified elsewhere	G70	Neuromuscular diseases
G80	Cerebral palsy	G80	Cerebral palsy and other paralytic syndromes
G81	Hemiplegia	G80	Cerebral palsy and other paralytic syndromes
G82	Quadriplegia, C5-C7 incomplete	G80	Cerebral palsy and other paralytic syndromes
G83	Paralytic syndrome	G80	Cerebral palsy and other paralytic syndromes
G89	Chronic pain syndrome	G89	Chronic pain syndrome
G90	Disorder of the autonomic nervous system	G90	Disorder of the autonomic nervous system
G91	Hydrocephalus	G91	Hydrocephalus
G92	Toxic encephalopathy	G92	Toxic encephalopathy
G93	Disorder of brain	G93	Disorder of brain
G94	Other disorders of brain in diseases classified elsewhere	G94	Other disorders of brain in diseases classified elsewhere
G95	Disease of spinal cord	G95	Disease of spinal cord
G96	Disorder of central nervous system	G96	Disorder of central nervous system
G97	Oth postproc complications and disorders of nervous sys	G97	Oth postproc complications and disorders of nervous sys
G98	Other disorders of nervous system	G98	Other disorders of nervous system
G99	Oth disrd of nervous system in diseases classified elsewhere	G99	Oth disrd of nervous system in diseases classified elsewhere
H00	Chalazion eye eyelid	H00	Hordeolum (stye) and chalazion
H01	inflammation of eyelid	H01	Inflammation of eyelid
H02	disorder of eyelid	H02	Disorder of eyelid
H03	Disorders of eyelid in diseases classified elsewhere	H03	Disorders of eyelid in diseases classified elsewhere
H04	Disorder of lacrimal system	H04	Disorder of lacrimal system
H05	disorder of orbit	H05	Disorder of orbit
H06	Disorders of lacrimal system and orbit	H06	Disorders of lacrimal system and orbit
H10	conjunctivitis	H10	Diseases of the conjunctivae
H11	disorder of conjunctiva	H10	Diseases of the conjunctivae
H13	Disorders of conjunctiva in diseases classified elsewhere	H10	Diseases of the conjunctivae
H15	disorder of sclera	H15	Diseases of the sclerae, corneae, iridae and corpus ciliaris
H16	keratitis	H15	Diseases of the sclerae, corneae, iridae and corpus ciliaris
H17	corneal scar and opacity	H15	Diseases of the sclerae, corneae, iridae and corpus ciliaris
H18	disorder of cornea	H15	Diseases of the sclerae, corneae, iridae and corpus ciliaris
H19	Disorders of sclera and cornea in diseases classified elsewhere	H15	Diseases of the sclerae, corneae, iridae and corpus ciliaris
H20	iridocyclitis	H15	Diseases of the sclerae, corneae, iridae and corpus ciliaris
H21	disorder of iris and ciliary body	H15	Diseases of the sclerae, corneae, iridae and corpus ciliaris
H22	Disorders of iris and ciliary body in diseases classd elswhr	H15	Diseases of the sclerae, corneae, iridae and corpus ciliaris
H25	age-related cataract	H25	Disorders of the lens
H26	cataract	H25	Disorders of the lens
H27	disorder of lens	H25	Disorders of the lens
H28	Cataract in diseases classified elsewhere	H25	Disorders of the lens
H30	chorioretinal inflammation, bilateral	H30	Chorioretinal inflammation, bilateral
H31	disorder of choroid	H31	Disorder of choroid
H32	Chorioretinal disorders in diseases classified elsewhere	H32	Chorioretinal disorders in diseases classified elsewhere
H33	Other retinal detachments	H33	Other retinal detachments
H34	retinal vascular occlusion	H34	Retinal vascular occlusion
H35	retinal disorder	H35	Retinal disorders
H36	Retinal disorders in diseases classified elsewhere	H36	Retinal disorders in diseases classified elsewhere
H40	glaucoma	H40	Glaucoma
H42	Glaucoma in diseases classified elsewhere	H40	Glaucoma
H43	disorder of vitreous body	H43	Disorders of the vitreous body and globe
H44	disorder of globe	H43	Disorders of the vitreous body and globe
H45	Disorders of vitreous body and globe in diseases classified elsewhere	H43	Disorders of the vitreous body and globe
H46	optic neuritis	H46	Disorders of the optic nerve and visual pathways
H47	disorder of visual pathways	H46	Disorders of the optic nerve and visual pathways
H48	Disorders of optic [2nd] nerve and visual pathways in diseases classified elsewhere	H46	Disorders of the optic nerve and visual pathways
H49	paralytic strabismus	H49	Disorders of the ocular muscles, binocular movement, accommodation and refraction
H50	strabismus	H49	Disorders of the ocular muscles, binocular movement, accommodation and refraction
H51	disorder of binocular movement	H49	Disorders of the ocular muscles, binocular movement, accommodation and refraction
H52	disorder of refraction	H49	Disorders of the ocular muscles, binocular movement, accommodation and refraction
H53	visual disturbance	H53	Visual disturbances and blindness
H54	Legal blindness	H53	Visual disturbances and blindness
H55	Other irregular eye movements	H59	Other disorders of eye and adnexa
H57	disorder of eye and adnexa	H59	Other disorders of eye and adnexa
H58	Other disorders of eye and adnexa in diseases classified elsewhere	H59	Other disorders of eye and adnexa
H59	Oth postproc comp and disorders of eye and adnexa, NEC	H59	Other disorders of eye and adnexa
H60	otitis externa, bilateral	J00	Upper respiratory infections and infections of the ear
H61	Disorder of external ear, bilateral	H60	Diseases of the external ear
H62	Oth disorders of ext ear in diseases classd elswhr, unsp ear	H60	Diseases of the external ear
H65	nonsuppurative otitis media, bilateral	J00	Upper respiratory infections and infections of the ear
H66	Otitis media, bilateral	J00	Upper respiratory infections and infections of the ear
H67	Otitis media in diseases classified elsewhere, unsp ear	J00	Upper respiratory infections and infections of the ear
H68	Extrinsic cartilagenous obst of eustach tube, unsp ear	H65	Diseases of the middle ear and mastoid
H69	Eustachian tube disorder, bilateral	H65	Diseases of the middle ear and mastoid
H70	mastoiditis, bilateral	H65	Diseases of the middle ear and mastoid
H71	cholesteatoma, bilateral	H65	Diseases of the middle ear and mastoid
H72	perforation of tympanic membrane, bilateral	H65	Diseases of the middle ear and mastoid
H73	disorder of tympanic membrane, bilateral	H65	Diseases of the middle ear and mastoid
H74	disorder of middle ear and mastoid, bilateral	H65	Diseases of the middle ear and mastoid
H75	Oth disrd of mid ear and mastoid in dis classd elswhr, bi	H65	Diseases of the middle ear and mastoid
H80	otosclerosis, bilateral	H80	Diseases of the inner ear
H81	disorder of vestibular function, bilateral	H80	Diseases of the inner ear
H82	Vertiginous syndromes in diseases classd elswhr, unsp ear	H80	Diseases of the inner ear
H83	disease of inner ear, bilateral	H80	Diseases of the inner ear
H90	Mix cndct/snrl hear loss,uni,l ear w rstrcd hear cntra side	H90	Other disorders of the ear
H91	hearing loss, bilateral	H90	Other disorders of the ear
H92	Otorrhagia, bilateral	H90	Other disorders of the ear
H93	Pulsatile tinnitus ear	H90	Other disorders of the ear
H94	Oth disrd of ear in diseases classified elsewhere, bilateral	H90	Other disorders of the ear
H95	Oth postproc comp and disorders of the ear/mastd, NEC	H90	Other disorders of the ear
I00	Rheumatic fever without heart involvement	I00	Acute rheumatic fever
I01	Acute rheumatic heart disease	I00	Acute rheumatic fever
I02	Rheumatic chorea without heart involvement	I00	Acute rheumatic fever
I05	Rheumatic mitral valve disease	I05	Chronic rheumatic heart disease
I06	Rheumatic aortic valve disease	I05	Chronic rheumatic heart disease
I07	Rheumatic tricuspid valve disease	I05	Chronic rheumatic heart disease
I08	Rheumatic multiple valve disease	I05	Chronic rheumatic heart disease
I09	Rheumatic heart disease	I05	Chronic rheumatic heart disease
I10	Essential (primary) hypertension	I10	Hypertensive disorders
I11	Hypertensive heart disease without heart failure	I10	Hypertensive disorders
I12	Hypertensive chronic kidney disease w stg 1-4/unsp chr kdny	I10	Hypertensive disorders
I13	Hyp hrt & chr kdny dis w hrt fail and w stg 5 chr kdny/ESRD	I10	Hypertensive disorders
I15	Secondary hypertension	I10	Hypertensive disorders
I20	Angina pectoris	I20	Angina pectoris
I21	myocardial infarction	I21	Ischemic heart disease
I22	Subsequent myocardial infarction	I21	Ischemic heart disease
I23	complications following acute myocardial infarction	I21	Ischemic heart disease
I24	Acute ischemic heart disease	I21	Ischemic heart disease
I25	Chronic ischemic heart disease	I21	Ischemic heart disease
I26	Other pulmonary embolism without acute cor pulmonale	I26	Venous thromboembolism
I27	Pulmonary heart disease	I27	Other pulmonary heart diseases
I28	Disease of pulmonary vessels	I27	Other pulmonary heart diseases
I30	Acute pericarditis	I30	Diseases of pericardium
I31	Disease of pericardium	I30	Diseases of pericardium
I32	Pericarditis in diseases classified elsewhere	I30	Diseases of pericardium
I33	Acute and subacute endocarditis	I33	Endocarditis
I34	Nonrheumatic mitral valve disorder	I34	Non-rheumatic valve disorders
I35	Nonrheumatic aortic valve disorder	I34	Non-rheumatic valve disorders
I36	Nonrheumatic tricuspid valve disorder	I34	Non-rheumatic valve disorders
I37	Nonrheumatic pulmonary valve disorder	I34	Non-rheumatic valve disorders
I38	Endocarditis, valve unspecified	I33	Endocarditis
I39	Endocarditis and heart valve disord in dis classd elswhr	I33	Endocarditis
I40	Acute myocarditis	I40	Myocarditis
I41	Myocarditis in diseases classified elsewhere	I40	Myocarditis
I42	Cardiomyopathy	I42	Cardiomyopathy
I43	Cardiomyopathy in diseases classified elsewhere	I42	Cardiomyopathy
I44	Atrioventricular and left bundle-branch block	I49	Cardiac arrhythmia
I45	Conduction disorder	I49	Cardiac arrhythmia
I46	Cardiac arrest	I49	Cardiac arrhythmia
I47	Paroxysmal tachycardia	I49	Cardiac arrhythmia
I48	atrial flutter	I49	Cardiac arrhythmia
I49	Cardiac arrhythmia	I49	Cardiac arrhythmia
I50	Heart failure	I50	Heart failure
I51	Complications and ill-defined descriptions of heart disease	I51	Complications and ill-defined descriptions of heart disease
I52	Other heart disorders in diseases classified elsewhere	I52	Other heart disorders in diseases classified elsewhere
I60	Nontraumatic subarachnoid hemorrhage	I60	Stroke
I61	Nontraumatic intracerebral hemorrhage	I60	Stroke
I62	Nontraumatic intracranial hemorrhage	I60	Stroke
I63	Cerebral infarction	I60	Stroke
I64	Stroke, not specified as haemorrhage or infarction	I60	Stroke
I65	Occlusion and stenosis of precerebral artery	I60	Stroke
I66	Occlusion and stenosis of cerebral artery	I60	Stroke
I67	Cerebrovascular disease	I60	Stroke
I68	Oth cerebrovascular disorders in diseases classd elswhr	I68	Oth cerebrovascular disorders in diseases classd elswhr
I69	Other sequelae following cerebrovascular disease	I69	Other sequelae following cerebrovascular disease
I70	Chronic total occlusion of artery of the extremities	I70	Chronic total occlusion of artery of the extremities
I71	Aortic aneurysm and dissection	I71	aneurysm and dissection
I72	Other aneurysm and dissection	I71	aneurysm and dissection
I73	Peripheral vascular disease	I73	Peripheral vascular disease
I74	Embolism and thrombosis of artery	I74	Arterial embolism and thrombosis
I75	Atheroembolism of other site	I75	Atheroembolism of other site
I76	Septic arterial embolism	I76	Septic arterial embolism
I77	Disorder of arteries and arterioles	I77	Disorder of arteries capillaries, and arterioles
I78	Disease of capillaries	I77	Disorder of arteries capillaries, and arterioles
I79	Oth disord of art,arterioles & capilare in dis classd elswhr	I77	Disorder of arteries capillaries, and arterioles
I80	Phlebitis and thrombophlebitis	I26	Venous thromboembolism
I81	Portal vein thrombosis	I26	Venous thromboembolism
I82	Chronic embolism and thombos unsp internal jugular vein	I26	Venous thromboembolism
I83	Varicose veins of lower extremities	I83	Varicose veins of lower extremities
I84	Haemorrhoids	I84	Haemorrhoids
I85	Secondary esophageal varices with bleeding	I85	Secondary esophageal varices with bleeding
I86	Varicose veins of other specified sites	I86	Varicose veins of other specified sites
I87	Disorder of vein	I87	Disorder of vein
I88	Nonspecific lymphadenitis	I88	Nonspecific lymphadenitis
I89	Noninfective disorder of lymphatic vessels and nodes, unsp	I89	Other non-infectious diseases of the lymph vessels and lymph nodes, unspecified
I95	Hypotension	I95	Hypotension
I96	Gangrene, not elsewhere classified	I96	Gangrene, not elsewhere classified
I97	Oth postproc comp and disorders of the circ sys, NEC	I97	Lymphedema
I98	Other disorders of circulatory system in diseases classified elsewhere	I99	Unspecified disorder of circulatory system
I99	Unspecified disorder of circulatory system	I99	Unspecified disorder of circulatory system
J00	Acute nasopharyngitis [common cold]	J00	Upper respiratory infections and infections of the ear
J01	Acute recurrent sinusitis	J00	Upper respiratory infections and infections of the ear
J02	Acute pharyngitis	J00	Upper respiratory infections and infections of the ear
J03	Acute recurrent tonsillitis	J00	Upper respiratory infections and infections of the ear
J04	Supraglottitis, with obstruction	J00	Upper respiratory infections and infections of the ear
J05	Acute epiglottitis with obstruction	J00	Upper respiratory infections and infections of the ear
J06	Acute upper respiratory infection	J00	Upper respiratory infections and infections of the ear
J09	Flu due to ident novel influenza A virus w oth manifest	J09	Influenza
J10	Influenza due to oth ident influenza virus w oth manifest	J09	Influenza
J11	Influenza due to unidentified influenza virus w oth manifest	J09	Influenza
J12	Viral pneumonia	J12	Pneumonia
J13	Pneumonia due to Streptococcus pneumoniae	J12	Pneumonia
J14	Pneumonia due to Hemophilus influenzae	J12	Pneumonia
J15	bacterial pneumonia	J12	Pneumonia
J16	Pneumonia due to other specified infectious organisms	J12	Pneumonia
J17	Pneumonia in diseases classified elsewhere	J12	Pneumonia
J18	Pneumonia organism	J12	Pneumonia
J20	Acute bronchitis	J20	Other Lower respiratory infections
J21	Acute bronchiolitis	J20	Other Lower respiratory infections
J22	acute lower respiratory infection	J20	Other Lower respiratory infections
J30	Allergic rhinitis	J30	Rhinitis
J31	Chronic pharyngitis	J30	Rhinitis
J32	Chronic sinusitis	J30	Rhinitis
J33	Nasal polyp	J33	Nasal polyp
J34	disorder of nose and nasal sinuses	J34	Disorder of nose and nasal sinuses
J35	Chronic disease of tonsils and adenoids	J35	Chronic disease of tonsils and adenoids
J36	Peritonsillar abscess	J36	Peritonsillar abscess
J37	Chronic laryngotracheitis	J37	Chronic laryngotracheitis
J38	Diseases of the vocal folds and larynx, not elsewhere specified	J38	Diseases of the vocal folds and larynx, not elsewhere specified
J39	Disease of upper respiratory tract	J39	Disease of upper respiratory tract
J40	Bronchitis, not specified as acute or chronic	J40	Bronchitis, not specified as acute or chronic
J41	Mixed simple and mucopurulent chronic bronchitis	J41	Chronic obstructive pulmonary disease
J42	chronic bronchitis	J41	Chronic obstructive pulmonary disease
J43	Emphysema	J41	Chronic obstructive pulmonary disease
J44	Chronic obstructive pulmonary disease	J41	Chronic obstructive pulmonary disease
J45	Other asthma	J45	Asthma
J46	Status asthmaticus	J45	Asthma
J47	Bronchiectasis, uncomplicated	J47	Bronchiectasis, uncomplicated
J60	Coalworker's pneumoconiosis	J60	Lung disease caused by external factors
J61	Pneumoconiosis due to asbestos and other mineral fibers	J60	Lung disease caused by external factors
J62	Pneumoconiosis due to other dust containing silica	J60	Lung disease caused by external factors
J63	Pneumoconiosis due to other specified inorganic dusts	J60	Lung disease caused by external factors
J64	pneumoconiosis	J60	Lung disease caused by external factors
J65	Pneumoconiosis associated with tuberculosis	J60	Lung disease caused by external factors
J66	Airway disease due to other specific organic dusts	J60	Lung disease caused by external factors
J67	Hypersensitivity pneumonitis due to organic dust	J60	Lung disease caused by external factors
J68	Unsp resp cond due to chemicals, gases, fumes and vapors	J60	Lung disease caused by external factors
J69	Pneumonitis due to inhalation of other solids and liquids	J60	Lung disease caused by external factors
J70	Respiratory conditions due to external causes	J70	Respiratory conditions due to external causes
J80	Acute respiratory distress syndrome	J80	Acute respiratory distress syndrome
J81	Chronic pulmonary edema	J81	Chronic pulmonary edema
J82	Pulmonary eosinophilia, not elsewhere classified	J82	Pulmonary eosinophilia, not elsewhere classified
J84	Interstitial pulmonary disease	J82	Pulmonary eosinophilia, not elsewhere classified
J85	Abscess of mediastinum	J85	Abscess of mediastinum
J86	Pyothorax without fistula	J86	Pyothorax without fistula
J90	Pleural effusion, not elsewhere classified	J90	Pleural effusion
J91	Pleural effusion in other conditions classified elsewhere	J90	Pleural effusion
J92	Pleural plaque without asbestos	J92	Pleural plaque without asbestos
J93	Pneumothorax	J93	Pneumothorax
J94	Pleural condition	J94	Pleural condition
J95	Oth postproc complications and disorders of resp sys, NEC	J95	Oth postproc complications and disorders of resp sys, NEC
J96	Respiratory failure with hypercapnia	J96	Respiratory failure with hypercapnia
J98	Respiratory disorder	J98	Respiratory disorder
J99	Respiratory disorders in diseases classified elsewhere	J99	Respiratory disorders in diseases classified elsewhere
K00	Disorder of tooth development	K00	Disease of hard tissue of teeth
K01	Impacted teeth	K00	Disease of hard tissue of teeth
K02	Dental caries	K00	Disease of hard tissue of teeth
K03	Disease of hard tissues of teeth	K00	Disease of hard tissue of teeth
K04	Other diseases of pulp and periapical tissues	K04	Diseases of pulp and periapical tissues
K05	Periodontal disease	K05	Periodontal disease
K06	Disorder of gingiva and edentulous alveolar ridge, unsp	K06	Disorder of gingiva and edentulous alveolar ridge, unsp
K07	Dentofacial anomalies	K07	Dentofacial anomalies
K08	Disorder of teeth and supporting structures	K08	Disorder of teeth and supporting structures
K09	Cyst of oral region	K09	Cyst of oral region
K10	Other diseases of jaws	K10	Other diseases of jaws
K11	Disease of salivary gland	K11	Disease of salivary gland
K12	Other oral mucositis (ulcerative)	K12	Stomatitis and related lesions
K13	Other lesions of oral mucosa	K13	Other lesions of oral mucosa
K14	Disease of tongue	K14	Disease of tongue
K20	Esophagitis	K20	Esophagitis
K21	Gastro-esophageal reflux disease without esophagitis	K21	Gastro-esophageal reflux disease without esophagitis
K22	Disease of esophagus	K22	Disease of esophagus
K23	Disorders of esophagus in diseases classified elsewhere	K23	Disorders of esophagus in diseases classified elsewhere
K25	Gastric ulcer, unsp as acute or chronic, w/o hemor or perf	K25	Gastric ulcer, unsp as acute or chronic, w/o hemor or perf
K26	Duodenal ulcer, unsp as acute or chronic, w/o hemor or perf	K26	Duodenal ulcer, unsp as acute or chronic, w/o hemor or perf
K27	Peptic ulc, site unsp, unsp as ac or chr, w/o hemor or perf	K27	Peptic ulc, site unsp, unsp as ac or chr, w/o hemor or perf
K28	Gastrojejunal ulcer, unsp as acute or chr, w/o hemor or perf	K28	Gastrojejunal ulcer, unsp as acute or chr, w/o hemor or perf
K29	Gastroduodenitis, with bleeding	K29	Gastroduodenitis, with bleeding
K30	Functional dyspepsia	K30	Functional dyspepsia
K31	Disease of stomach and duodenum	K31	Disease of stomach and duodenum
K35	Other acute appendicitis	K35	Appendicitis
K36	Other appendicitis	K35	Appendicitis
K37	appendicitis	K35	Appendicitis
K38	Disease of appendix	K38	Disease of appendix
K40	Unilateral inguinal hernia, w/o obst or gangrene, recurrent	K40	Hernia
K41	Unilateral femoral hernia, w/o obst or gangrene, recurrent	K40	Hernia
K42	Umbilical hernia without obstruction or gangrene	K40	Hernia
K43	Ventral hernia without obstruction or gangrene	K40	Hernia
K44	Diaphragmatic hernia without obstruction or gangrene	K40	Hernia
K45	Oth abdominal hernia without obstruction or gangrene	K40	Hernia
K46	abdominal hernia without obstruction or gangrene	K40	Hernia
K50	Crohn's disease, with complications	K50	Inflammatory bowel disease
K51	Ulcerative colitis, unsp with complications	K50	Inflammatory bowel disease
K52	Noninfective gastroenteritis and colitis	K52	Noninfective gastroenteritis and colitis
K55	Vascular disorder of intestine	K55	Vascular disorder of intestine
K56	Ileus	K56	Ileus
K57	Dvtrcli of intest, part unsp, w/o perf or abscess w bleeding	K57	Diverticle of the intestine
K58	Irritable bowel syndrome without diarrhea	K58	Irritable bowel syndrome without diarrhea
K59	Functional intestinal disorder	K59	Functional intestinal disorder
K60	Fissure and fistula of the anal and rectal regions	K60	Fissure and fistula of the anal and rectal regions
K61	Intrasphincteric abscess	K61	Intrasphincteric abscess
K62	Disease of anus and rectum	K62	Disease of anus and rectum
K63	Disease of intestine	K63	Disease of intestines
K64	hemorrhoids	K64	Hemorrhoids
K65	Peritonitis	K65	Peritonitis
K66	Disorder of peritoneum	K66	Disorder of peritoneum
K67	Disorders of peritoneum in infectious diseases classd elswhr	K67	Disorders of peritoneum in infectious diseases classd elswhr
K68	Other disorders of retroperitoneum	K68	Other disorders of retroperitoneum
K70	Alcoholic liver disease	K70	Alcoholic liver disease
K71	Toxic liver disease	K71	Toxic liver disease
K72	Hepatic failure, not elsewhere specified	K72	Hepatic failure, not elsewhere specified
K73	Chronic hepatitis	K73	Chronic hepatitis
K74	Other cirrhosis of liver	K74	Other cirrhosis of liver
K75	Inflammatory liver disease	K75	Inflammatory liver disease
K76	Liver disease	K76	Liver disease
K77	Liver disorders in diseases classified elsewhere	K77	Liver disorders in diseases classified elsewhere
K80	Other cholelithiasis with obstruction	K80	Other cholelithiasis with obstruction
K81	Cholecystitis	K81	Cholecystitis
K82	Disease of gallbladder	K82	Disease of gallbladder and biliary tract
K83	Disease of biliary tract	K82	Disease of gallbladder and biliary tract
K85	Acute pancreatitis with infected necrosis	K85	Acute pancreatitis with infected necrosis
K86	Disease of pancreas	K86	Disease of pancreas
K87	Disord of GB, biliary trac and pancreas in dis classd elswhr	K87	Disord of GB, biliary trac and pancreas in dis classd elswhr
K90	Intestinal malabsorption	K90	Intestinal malabsorption
K91	Oth postprocedural complications and disorders of dgstv sys	K91	Oth postprocedural complications and disorders of dgstv sys
K92	Other disease of digestive system	K92	Other disease of digestive system
K93	Disorders of other digestive organs in diseases classified elsewhere	K93	Disorders of other digestive organs in diseases classified elsewhere
L00	Staphylococcal scalded skin syndrome	L01	Other skin and subcutaneous infections
L01	Impetiginization of other dermatoses	L01	Other skin and subcutaneous infections
L02	Carbuncle	L01	Other skin and subcutaneous infections
L03	Acute lymphangitis	L01	Other skin and subcutaneous infections
L04	Acute lymphadenitis	L04	Acute lymphadenitis
L05	Pilonidal sinus without abscess	L01	Other skin and subcutaneous infections
L08	Local infection of the skin and subcutaneous tissue, unsp	L01	Other skin and subcutaneous infections
L10	Pemphigus	L10	Bullous disorders
L11	Acantholytic disorder	L10	Bullous disorders
L12	Pemphigoid	L10	Bullous disorders
L13	Bullous disorder	L10	Bullous disorders
L14	Bullous disorders in diseases classified elsewhere	L10	Bullous disorders
L20	Atopic dermatitis	L20	Dermatitis
L21	Seborrheic dermatitis	L20	Dermatitis
L22	Diaper dermatitis	L20	Dermatitis
L23	Allergic contact dermatitis cause	L20	Dermatitis
L24	Irritant contact dermatitis cause	L20	Dermatitis
L25	contact dermatitis cause	L20	Dermatitis
L26	Exfoliative dermatitis	L20	Dermatitis
L27	Dermatitis due to substance taken internally	L20	Dermatitis
L28	Other prurigo	L20	Dermatitis
L29	Pruritus	L20	Dermatitis
L30	Dermatitis	L20	Dermatitis
L40	Psoriasis	L40	Papulosquamous disorders
L41	Parapsoriasis	L40	Papulosquamous disorders
L42	Pityriasis rosea	L40	Papulosquamous disorders
L43	Lichen planus	L40	Papulosquamous disorders
L44	Papulosquamous disorder	L40	Papulosquamous disorders
L45	Papulosquamous disorders in diseases classified elsewhere	L40	Papulosquamous disorders
L50	Urticaria	L50	Urticaria
L51	Erythema multiforme	L51	Erythema
L52	Erythema nodosum	L51	Erythema
L53	Erythematous condition	L51	Erythema
L54	Erythema in diseases classified elsewhere	L51	Erythema
L55	Sunburn	L57	Skin changes due to chronic exposure to non-ionizing radiation
L56	Acute skin change due to ultraviolet radiation	L57	Skin changes due to chronic exposure to non-ionizing radiation
L57	Skin changes due to chr expsr to nonionizing radiation	L57	Skin changes due to chronic exposure to non-ionizing radiation
L58	Radiodermatitis	L58	Radiodermatitis
L59	Disorder of the skin, subcu related to radiation	L59	Disorder of the skin, subcu related to radiation
L60	Nail disorder	L60	Nail disorders
L62	Nail disorders in diseases classified elsewhere	L60	Nail disorders
L63	Alopecia areata	L63	Alopecia
L64	Androgenic alopecia	L63	Alopecia
L65	Nonscarring hair loss	L63	Alopecia
L66	Cicatricial alopecia	L63	Alopecia
L67	Hair color and hair shaft abnormality	L67	Hair color and hair shaft abnormality
L68	Hypertrichosis	L68	Hypertrichosis
L70	Acne	L70	Acne
L71	Rosacea	L71	Rosacea
L72	Follicular cyst of the skin and subcutaneous tissue	L72	Follicular cyst of the skin and subcutaneous tissue
L73	Follicular disorder	L73	Follicular disorders
L74	Eccrine sweat disorder	L74	Sweat disorder
L75	Apocrine sweat disorder	L74	Sweat disorder
L80	Vitiligo	L80	Vitiligo
L81	Disorder of pigmentation	L81	Disorder of pigmentation
L82	Other seborrheic keratosis	L82	Other seborrheic keratosis
L83	Acanthosis nigricans	L83	Acanthosis nigricans
L84	Corns and callosities	L84	Corns and callosities
L85	Epidermal thickening	L85	Epidermal thickening
L86	Keratoderma in diseases classified elsewhere	L86	Keratoderma in diseases classified elsewhere
L87	Transepidermal elimination disorder	L87	Transepidermal elimination disorder
L88	Pyoderma gangrenosum	L88	Pyoderma gangrenosum
L89	Pressure ulcer	L89	Pressure ulcer
L90	Atrophic skin diseases	L90	Atrophic skin diseases
L91	Hypertrophic skin diseases	L91	Hypertrophic skin diseases
L92	Granulomatous disorder of the skin	L92	Granulomatous disorder of the skin
L93	Other local lupus erythematosus	L93	Other local lupus erythematosus
L94	Localized connective tissue disorder	L94	Localized connective tissue disorder
L95	Vasculitis limited to the skin	L95	Vasculitis limited to the skin
L97	Non-prs chronic ulc unsp prt of l low leg w unsp severity	L97	Non-prs chronic ulc unsp prt of l low leg w unsp severity
L98	Disorder of the skin and subcutaneous tissue	L98	Disorder of the skin and subcutaneous tissue
L99	Oth disorders of skin, subcu in diseases classd elswhr	L99	Oth disorders of skin, subcu in diseases classd elswhr
M00	Pyogenic arthritis	M00	Infectious arthropathies
M01	Dir infct of mult joints in infec/parastc dis classd elswhr	M00	Infectious arthropathies
M02	Reactive arthropathy	M00	Infectious arthropathies
M03	Postinfective and reactive arthropathies in diseases classified elsewhere	M00	Infectious arthropathies
M04	Autoinflammatory syndrome	M04	Autoimmune arthritis
M05	Rheumatoid arthritis with rheumatoid factor	M04	Autoimmune arthritis
M06	Rheumatoid arthritis	M04	Autoimmune arthritis
M07	Enteropathic arthropathies, multiple sites	M04	Autoimmune arthritis
M08	Juvenile arthritis, multiple sites	M04	Autoimmune arthritis
M09	Juvenile arthritis in diseases classified elsewhere	M04	Autoimmune arthritis
M10	Gout	M14	Other Inflammatory polyarthropathies
M11	Crystal arthropathy	M14	Other Inflammatory polyarthropathies
M12	Arthropathy	M14	Other Inflammatory polyarthropathies
M13	Other specified arthritis, multiple sites	M14	Other Inflammatory polyarthropathies
M14	Arthropathies in oth diseases classd elswhr, multiple sites	M14	Other Inflammatory polyarthropathies
M15	Polyosteoarthritis	M15	Osteoarthrosis
M16	Osteoarthrosis of hip	M15	Osteoarthrosis
M17	Osteoarthrosis of knee	M15	Osteoarthrosis
M18	Osteoarthrosis of first carpometacarpal joint	M15	Osteoarthrosis
M19	Secondary osteoarthrosis site	M15	Osteoarthrosis
M20	Acquired deformities of fingers and toes	M20	Other joint disorders
M21	Other acquired deformities of limbs	M20	Other joint disorders
M22	Disorders of patella	M20	Other joint disorders
M23	Internal derangement of knee	M20	Other joint disorders
M24	Joint derangement	M20	Other joint disorders
M25	Joint disorder	M20	Other joint disorders
M30	Other conditions related to polyarteritis nodosa	M30	Systemic connective tissue disorders
M31	Necrotizing vasculopathy	M30	Systemic connective tissue disorders
M32	Systemic lupus erythematosus	M30	Systemic connective tissue disorders
M33	Dermatopolymyositis, unsp with other organ involvement	M30	Systemic connective tissue disorders
M34	Systemic sclerosis	M30	Systemic connective tissue disorders
M35	Systemic involvement of connective tissue	M30	Systemic connective tissue disorders
M36	Systemic disord of conn tiss in oth diseases classd elswhr	M30	Systemic connective tissue disorders
M40	Lordosis, lumbosacral region	M40	Deforming dorsopathies
M41	Scoliosis	M40	Deforming dorsopathies
M42	Spinal osteochondrosis	M40	Deforming dorsopathies
M43	Deforming dorsopathy	M40	Deforming dorsopathies
M45	Ankylosing spondylitis s in spine	M45	Ankylosing spondylitis s in spine
M46	Unsp inflammatory spondylopathy, multiple sites in spine	M46	Unsp inflammatory spondylopathy, multiple sites in spine
M47	Spondylosis	M47	Spondylosis
M48	Spondylopathy	M48	Spondylopathy
M49	Spond in diseases classd elswhr, multiple sites in spine	M49	Spond in diseases classd elswhr, multiple sites in spine
M50	Cervical disc disorder, cervicothoracic region	M50	Cervical disc disorder, cervicothoracic region
M51	Unsp thoracic, thoracolum and lumbosacr intvrt disc disorder	M50	Cervical disc disorder, cervicothoracic region
M53	Dorsopathy	M53	Dorsopathy
M54	Dorsalgia	M54	Dorsalgia
M60	Myositis	M60	Disorders of muscles
M61	Calcification and ossification of muscle	M60	Disorders of muscles
M62	Disorder of muscle	M60	Disorders of muscles
M63	Disord of muscle in diseases classd elswhr, multiple sites	M60	Disorders of muscles
M65	Synovitis and tenosynovitis	M65	Disorders of synovium and tendons
M66	Spontaneous rupture of tendon	M65	Disorders of synovium and tendons
M67	disorder of synovium and tendon, multiple sites	M65	Disorders of synovium and tendons
M68	Disorders of synovium and tendon in diseases classified elsewhere	M65	Disorders of synovium and tendons
M70	Unsp soft tissue disord related to use/pressure mult sites	M70	Unspecified soft tissue disorders related to use/pressure
M71	Bursopathy	M71	Bursopathy
M72	Fibroblastic disorder	M72	Fibroblastic disorder
M73	Soft tissue disorders in diseases classified elsewhere	M73	Soft tissue disorders in diseases classified elsewhere
M75	Shoulder lesion	M75	Shoulder lesion
M76	enthesopathy, lower limb, excluding foot	M77	Enthesopathy
M77	Enthesopathy	M77	Enthesopathy
M79	Myalgia and Pain in limb	M79	Myalgia and Pain in limb
M80	Oth osteopor w current path fracture, vertebra(e), sequela	M80	Osteoporosis
M81	Other osteoporosis without current pathological fracture	M80	Osteoporosis
M82	Other osteoporosis without current pathological fracture	M80	Osteoporosis
M83	Adult osteomalacia	M83	Adult osteomalacia
M84	Disorder of continuity of bone	M84	Disorder of continuity of bone
M85	Other Disorder of bone density and structure	M85	Other Disorders of bone density and structure
M86	Osteomyelitis	M86	Osteomyelitis
M87	Osteonecrosis	M87	Osteonecrosis
M88	Osteitis deformans of bone	M88	Osteitis deformans of bone
M89	Other Disorder of bone	M89	Other Disorder of bone
M90	Osteopathy in diseases classified elsewhere, multiple sites	M90	Osteopathy
M91	Juvenile osteochondrosis of hip and pelvis	M91	Juvenile osteochondrosis of hip and pelvis
M92	Juvenile osteochondrosis	M92	Juvenile osteochondrosis
M93	Osteochondropathy multiple sites	M93	Chondropathies
M94	Disorder of cartilage	M93	Chondropathies
M95	Acquired deformity of musculoskeletal system	M95	Acquired deformity of musculoskeletal system
M96	Oth intraop and postproc comp and disorders of the ms sys	M96	Oth intraop and postproc comp and disorders of the ms sys
M99	Biomechanical lesion	M99	Biomechanical lesion
N00	Acute nephritic syndrome	N08	Glomerular disorders
N01	Rapidly progr nephritic syndrome	N08	Glomerular disorders
N02	Recurrent and perst hematuria	N08	Glomerular disorders
N03	Chronic nephritic syndrome	N08	Glomerular disorders
N04	Nephrotic syndrome	N08	Glomerular disorders
N05	Unsp nephritic syndrome	N08	Glomerular disorders
N06	Isolated proteinuria	N08	Glomerular disorders
N07	Hereditary nephropathy	N08	Glomerular disorders
N08	Glomerular disorders in diseases classified elsewhere	N08	Glomerular disorders
N10	Acute pyelonephritis	N39	Disorders of urinary system, possibly infection
N11	Chronic tubulo-interstitial nephritis	N11	Renal tubulo-interstitial diseases
N12	Tubulo-interstitial nephritis, not spcf as acute or chronic	N11	Renal tubulo-interstitial diseases
N13	Obstructive and reflux uropathy	N13	Obstructive and reflux uropathy
N14	Toxic nephropathy, not elsewhere classified	N11	Renal tubulo-interstitial diseases
N15	Renal tubulo-interstitial disease	N11	Renal tubulo-interstitial diseases
N16	Renal tubulo-interstitial disord in diseases classd elswhr	N11	Renal tubulo-interstitial diseases
N17	Acute kidney failure	N17	Renal failure
N18	Chronic kidney disease	N17	Renal failure
N19	Unspecified kidney failure	N17	Renal failure
N20	Urinary calculus	N20	Urolithiasis
N21	Calculus of lower urinary tract	N20	Urolithiasis
N22	Calculus of urinary tract in diseases classified elsewhere	N20	Urolithiasis
N23	renal colic	N20	Urolithiasis
N25	Disorder rslt from impaired renal tubular function, unsp	N29	Oth disorders of kidney and ureter
N26	Renal sclerosis	N29	Oth disorders of kidney and ureter
N27	Small kidney	N29	Oth disorders of kidney and ureter
N28	Disorder of kidney and ureter	N29	Oth disorders of kidney and ureter
N29	Oth disorders of kidney and ureter in diseases classd elswhr	N29	Oth disorders of kidney and ureter
N30	Cystitis with hematuria	N39	Disorders of urinary system, possibly infection
N31	Neuromuscular dysfunction of bladder	N31	Neuromuscular dysfunction of bladder
N32	Bladder disorder	N32	Bladder disorder
N33	Bladder disorders in diseases classified elsewhere	N33	Bladder disorders in diseases classified elsewhere
N34	Urethral syndrome	N34	Urethral syndrome
N35	Urethral stricture	N35	Urethral stricture
N36	Urethral disorder	N36	Urethral disorder
N37	Urethral disorders in diseases classified elsewhere	N37	Urethral disorders in diseases classified elsewhere
N39	Other disorder of urinary system	N39	Disorders of urinary system, possibly infection
N40	Nodular prostate with lower urinary tract symptoms	N40	Nodular prostate with lower urinary tract symptoms
N41	Inflammatory disease of prostate	N41	Inflammatory disease of prostate
N42	Disorder of prostate	N42	Disorder of prostate
N43	Spermatocele of epididymis, multiple	N43	Spermatocele of epididymis, multiple
N44	Other noninflammatory disorders of the testis	N44	Other noninflammatory disorders of the testis
N45	Abscess of epididymis or testis	N45	Abscess of epididymis or testis
N46	Male infertility	N46	Male infertility
N47	Other disorders of prepuce	N47	Other disorders of prepuce
N48	Disorder of penis	N48	Disorder of penis
N49	Inflammatory disorder of male genital organ	N49	Inflammatory disorder of male genital organ
N50	Disorder of male genital organs	N50	Disorder of male genital organs
N51	Disorders of male genital organs in diseases classd elswhr	N51	Disorders of male genital organs in diseases classd elswhr
N60	benign mammary dysplasia	N60	Benign mammary dysplasia
N61	Inflammatory disorders of breast	N61	Inflammatory disorders of breast
N62	Hypertrophy of breast	N62	Hypertrophy of breast
N63	lump in breast	N63	Lump in breast
N64	Other disorders of breast	N64	Other disorders of breast
N70	Salpingitis and oophoritis	N70	Inflammatory diseases of the female pelvic organs
N71	Inflammatory disease of uterus	N70	Inflammatory diseases of the female pelvic organs
N72	Inflammatory disease of cervix uteri	N70	Inflammatory diseases of the female pelvic organs
N73	Female pelvic inflammatory disease	N70	Inflammatory diseases of the female pelvic organs
N74	Female pelvic inflam disorders in diseases classd elswhr	N70	Inflammatory diseases of the female pelvic organs
N75	Disease of Bartholin's gland	N70	Inflammatory diseases of the female pelvic organs
N76	Other specified inflammation of vagina and vulva	N70	Inflammatory diseases of the female pelvic organs
N77	Vaginitis, vulvitis and vulvovaginitis in dis classd elswhr	N70	Inflammatory diseases of the female pelvic organs
N80	Endometriosis	N80	Endometriosis
N81	Female genital prolapse	N81	Female genital prolapse
N82	Female genital tract fistula	N82	Female genital tract fistula
N83	Non-inflammatory ovarian diseases, fallopian tubes & broad ligaments	N83	Non-inflammatory ovarian diseases, fallopian tubes & broad ligaments
N84	Polyp of female genital tract	N84	Polyp of female genital tract
N85	Other non-inflammatory diseases of the uterus, except cervix	N85	Other non-inflammatory diseases of the uterus, except cervix
N86	Erosion and ectropion of cervix uteri	N86	Erosion and ectropion of cervix uteri
N87	Dysplasia of cervix uteri	N87	Dysplasia of cervix uteri
N88	Non-inflammatory disorder of cervix uteri	N88	Non-inflammatory disorders of cervix uteri
N89	Non-inflammatory vaginal diseases	N89	Non-inflammatory vaginal diseases
N90	Non-inflammatory disorder of vulva and perineum	N90	Non-inflammatory disorders of vulva and perineum
N91	Oligomenorrhea	N92	Irregular menstruation
N92	Irregular menstruation	N92	Irregular menstruation
N93	Other abnormal uterine and vaginal bleeding	N93	Other abnormal uterine and vaginal bleeding
N94	Unsp cond assoc w female genital organs and menstrual cycle	N94	Unsp cond assoc w female genital organs and menstrual cycle
N95	Menopausal and perimenopausal disorders	N95	Menopausal and perimenopausal disorders
N96	Recurrent pregnancy loss	N96	Recurrent pregnancy loss
N97	Female infertility	N97	Female infertility
N98	Complication associated with artificial fertilization, unsp	N98	Complication associated with artificial fertilization, unsp
N99	Oth postprocedural complications and disorders of GU sys	N99	Oth postprocedural complications and disorders of GU sys
